# Supplementary material for: Flexible Electrode Based on PES/GO Mixed Matrix Woven Membrane for Efficient Photoelectrochemical Water Splitting Application
Source: MDPI journal article supplement (doi:10.3390/membranes13070653), 2023-07-08
Supplement: s1 [file s1]

## Supplementary Data

### Flexible electrode based on PES/GO Mixed matrix woven membrane for efficient photoelectrochemical water splitting application

Ghadah M. Al-Senani <sup>1</sup>, Mohamed Zayed <sup>2</sup>, Mervat Nasr <sup>2,3</sup>, Sahar S. Ali <sup>4</sup>, Mohamed Shaban <sup>5,2\*</sup>, Fatma Mohamed <sup>2,3,6</sup>

<sup>1</sup> Department of Chemistry, College of Science, Princess Nourah bint Abdulrahman University, P.O. Box 84428, Riyadh 11671, Saudi Arabia

<sup>2</sup> Nanophotonics and Applications Lab, Physics Department, Faculty of Science, Beni-Suef University, Beni-Suef 62514, Egypt

<sup>3</sup> Chemistry Department, Faculty of Science, Beni-Suef University, Beni-Suef 62514, Egypt

<sup>4</sup> Chemical Engineering and Pilot-Plant Department, National Research Center, P.O. Box 12622, Dokki, Cairo, Egypt

<sup>5</sup> Department of Physics, Faculty of Science, Islamic University of Madinah, P. O. Box: 170, Madinah 42351, Saudi Arabia

<sup>6</sup> Materials Science Research Laboratory, Chemistry Department, Faculty of Science, Beni-Suef University, Beni-Suef, Egypt

\* Correspondence: author: mssfadel@aucegypt.edu

**Table S1.** Values of electronic conductance and ionic conductance of PES/GO electrode.

| Sample                                   | PG0                                       | PG1                             | PG2                             | PG3                             | PG4                             | PG5                             |
|------------------------------------------|-------------------------------------------|---------------------------------|---------------------------------|---------------------------------|---------------------------------|---------------------------------|
| Electronic Conductance ( $\mu\text{S}$ ) | $4.85869\text{E-}4 \pm 2.28843\text{E-}6$ | $0.02429 \pm 1.14421\text{E-}4$ | $0.09717 \pm 4.57686\text{E-}4$ | $0.02186 \pm 1.02979\text{E-}4$ | $0.01992 \pm 9.38256\text{E-}5$ | $0.01822 \pm 8.58161\text{E-}5$ |
| Ionic Conductance (mS)                   | $0.16223 \pm 0.00167$                     | $0.70683 \pm 0.00182$           | $2.71506 \pm 0.00307$           | $0.14521 \pm 0.00167$           | $0.12819 \pm 0.00166$           | $0.10096 \pm 0.00166$           |

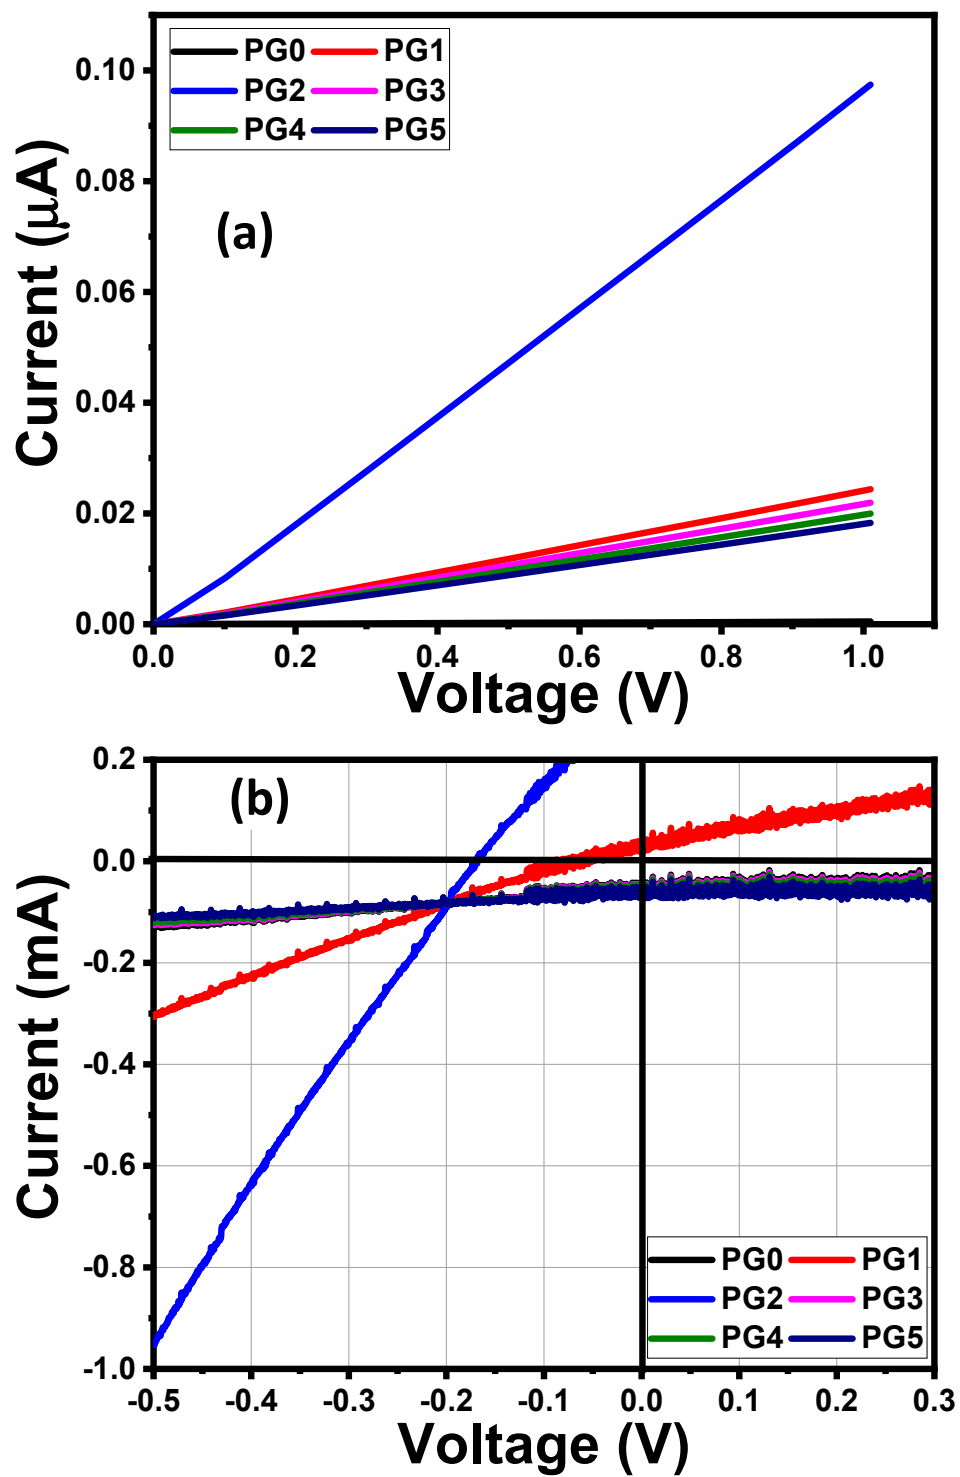

**Figure S1.** I-V characteristics of the PES/GO electrodes for (a) electronic conductance and (b) ionic conductance calculations.

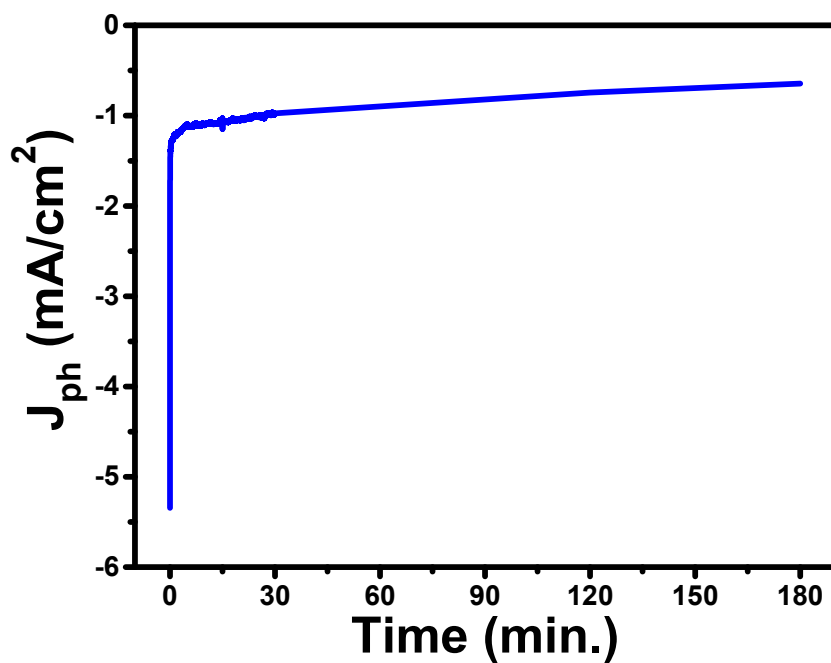

**Figure S2.** chronoamperometry  $J_{ph}$ -t response of PG2 for 180 min at 0.3 M of sodium sulfate ( $\text{Na}_2\text{SO}_4$ ) aqueous solution under applied bias voltage of -1V.

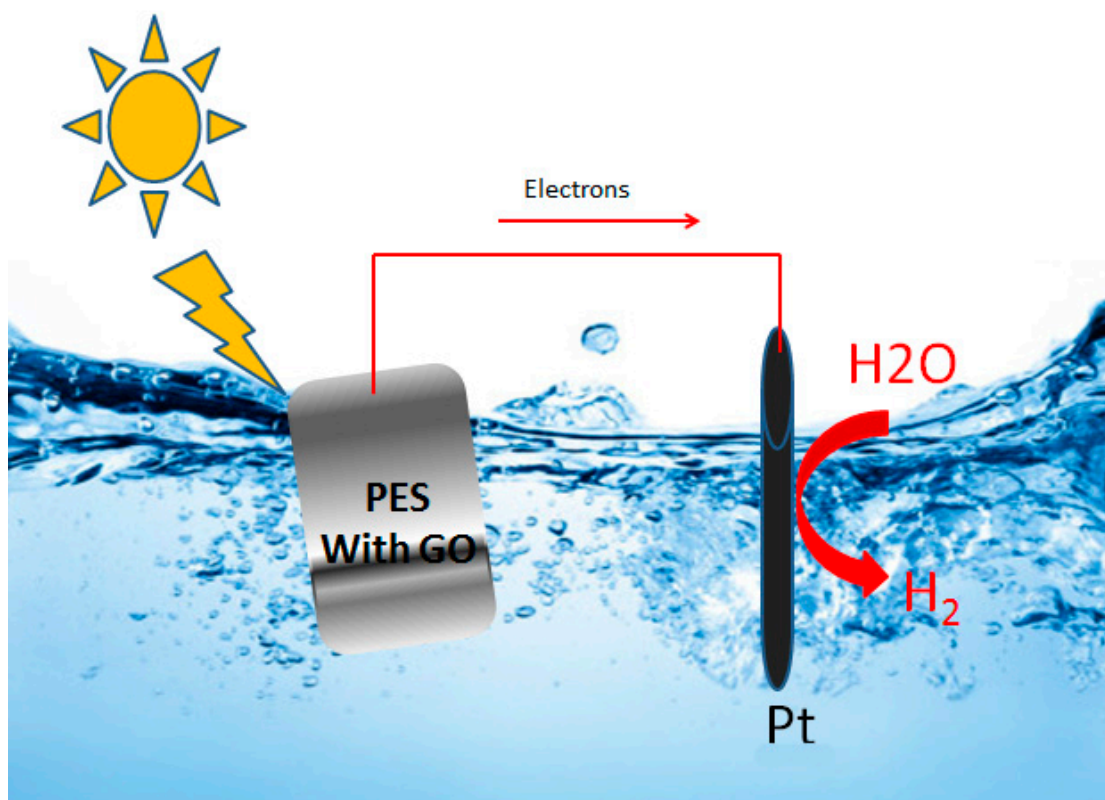

**Figure S3.** Schematic diagram for PEC water splitting using PES/GO electrode.
